# Supplementary material for: Progression of Arterial Stiffness is Associated With Midlife Diastolic Blood Pressure and Transition to Late‐Life Hypertensive Phenotypes
Source: PubMed Central journal article supplement (PMC6988142; doi:10.1161/jaha.119.014547), 2020-01-04

# **SUPPLEMENTAL MATERIAL**

**Table S1. Associations between blood pressure and arterial stiffness at baseline with demographic features.** Beta-coefficients and  $r^2$  are shown for univariate general linear models. In models adjusted for age / sex or for age / sex / cardiovascular risk factors (diabetes, current smoking and cholesterol). The beta-coefficient for each independent variable (by row) with the dependent variable (by column) is given, with the  $R^2$  squared change compared to the models including only age and sex; or age, sex and cardiovascular risk factors. Associations are reported for the population in whom arterial stiffness index (ASI) was recorded at baseline. SBP=systolic blood pressure; DBP = diastolic blood pressure, PP = pulse pressure. All associations are significant, except where indicated \* $p>0.05$ . n=169,742. ASI = arterial stiffness index; SBP = systolic blood pressure; DBP = diastolic blood pressure; PP = pulse pressure; MBP = mean blood pressure; HTN = hypertension; BMI = body mass index;

|                    | SBP     |              | DBP     |              | PP      |              | ASI     |              |
|--------------------|---------|--------------|---------|--------------|---------|--------------|---------|--------------|
|                    | $\beta$ | $\Delta R^2$ | $\beta$ | $\Delta R^2$ | $\beta$ | $\Delta R^2$ | $\beta$ | $\Delta R^2$ |
| <i>Univariate</i>  |         |              |         |              |         |              |         |              |
| Age                | 0.75    | 0.106        | 0.05    | 0.002        | 0.7     | 0.174        | 0.08    | 0.043        |
| Female Sex         | 3.96    | 0.022        | 2.38    | 0.027        | 1.59    | 0.007        | 0.85    | 0.038        |
| Diabetes           | 0.94    | 0.002*       | -2.34   | 0.001        | 3.22    | 0.005        | -0.05   | 0.002*       |
| HTN                | 12.91   | 0.094        | 5.52    | 0.058        | 7.33    | 0.058        | 0.7     | 0.01         |
| Smoking Base       | -2.75   | 0.002        | -0.65   | 0            | -2.09   | 0.002        | 0.7     | 0.005        |
| Ever Smoked        | 1       | 0.001        | 0.07    | 0*           | 0.93    | 0.001        | 0.61    | 0.01         |
| Creatinine         | 0.06    | 0.004        | 0.03    | 0.004        | 0.03    | 0.002        | 0.02    | 0.009        |
| Cholesterol        | 1.72    | 0.011        | 1.16    | 0.017        | 0.55    | 0.002        | 0       | 0*           |
| BMI                | 0.73    | 0.035        | 0.59    | 0.077        | 0.14    | 0.003        | 0.07    | 0.013        |
| Weight             | 0.2     | 0.03         | 0.18    | 0.081        | 0.02    | 0.001        | 0.03    | 0.03         |
| SBP                |         |              | 0.38    | 0.488        | 0.62    | 0.715        | 0.03    | 0.024        |
| DBP                | 1.28    | 0.488        |         |              | 0.28    | 0.045        | 0.06    | 0.034        |
| MBP                | 1.42    | 0.837        | 0.79    | 0.863        | 0.46    | 0.149        | 0.05    | 0.034        |
| PP                 | 1.16    | 0.715        | 0.16    | 0.045        |         |              | 0.02    | 0.006        |
| ASI                | 0.94    | 0.024        | 0.6     | 0.034        | 0.34    | 0.006        |         |              |
| <i>+ Age / Sex</i> |         |              |         |              |         |              |         |              |
| SBP                |         |              | 0.41    | 0.502        | 0.59    | 0.56         | 0.01    | 0.004        |
| DBP                | 1.25    | 0.452        |         |              | 0.25    | 0.035        | 0.05    | 0.022        |
| MBP                | 1.38    | 0.734        | 0.81    | 0.855        | 0.41    | 0.108        | 0.03    | 0.014        |
| PP                 | 1.17    | 0.596        | 0.17    | 0.041        |         |              | -0.01   | 0.001        |
| ASI                | 0.4     | 0.007        | 0.52    | 0.02         | -0.11   | 0.005        |         |              |
| <i>+ CV RFs</i>    |         |              |         |              |         |              |         |              |
| SBP                |         |              | 0.4     | 0.454        | 0.60    | 0.544        | 0.01    | 0.004        |
| DBP                | 1.21    | 0.402        |         |              | 0.21    | 0.026        | 0.05    | 0.021        |
| MBP                | 1.38    | 0.678        | 0.81    | 0.795        | 0.40    | 0.093        | 0.03    | 0.013        |
| PP                 | 1.13    | 0.561        | 0.13    | 0.056        |         |              | -0.01   | 0.003        |
| ASI                | 0.32    | 0.026        | 0.48    | 0.049        | -0.15   | 0.01         |         |              |

Dependent variables are shown in each column, with independent variables listed by row.

**Table S2. Associations between blood pressure and arterial stiffness at follow-up 2, with demographic features and ASI or blood pressure at baseline.** Beta-coefficients and  $r^2$  are shown for univariate general linear models. In models adjusted for age / sex or for age / sex / cardiovascular risk factors (diabetes, current smoking and cholesterol) the beta-coefficient for each key index (row) with the dependent variable (by column) is given, with the  $R^2$  squared change compared to the models including only age and sex; or age, sex and cardiovascular risk factors. Associations are reported for the population in whom arterial stiffness index (ASI) was recorded at baseline. SBP=systolic blood pressure; DBP = diastolic blood pressure; MBP = mean blood pressure; HTN = hypertension; PP = pulse pressure; BMI = body mass index; n=13761.

|                                 | Measures at follow-up 2 |              |         |              |         |              |         |              |
|---------------------------------|-------------------------|--------------|---------|--------------|---------|--------------|---------|--------------|
|                                 | SBP                     |              | DBP     |              | PP      |              | ASI     |              |
|                                 | $\beta$                 | $\Delta R^2$ | $\beta$ | $\Delta R^2$ | $\beta$ | $\Delta R^2$ | $\beta$ | $\Delta R^2$ |
| <i>Univariate</i>               |                         |              |         |              |         |              |         |              |
| <b>Age</b>                      | 0.74                    | 0.11         | 0.07    | 0            | 0.66    | 0.17         | 0.06    | 0.03         |
| <b>Female</b>                   | 4                       | 0.02         | 2.36    | 0.03         | 1.65    | 0.01         | 1.23    | 0.1          |
| <b>Diabetes</b>                 | 1.66                    | 0.001*       | -2.09   | 0            | 3.7     | 0            | -0.13   | 0.001*       |
| <b>HTN</b>                      | 13.11                   | 0.1          | 6.04    | 0.07         | 7.02    | 0.06         | 0.59    | 0.01         |
| <b>Smoking Base Ever Smoked</b> | -3.5                    | 0            | -0.86   | 0            | -2.64   | 0            | 0.59    | 0            |
| <b>Creatinine</b>               | 0.73                    | 0            | 0.02    | 0*           | 0.72    | 0            | 0.58    | 0.01         |
| <b>Cholesterol</b>              | 0.08                    | 0.01         | 0.04    | 0.01         | 0.03    | 0            | 0.02    | 0.03         |
| <b>BMI</b>                      | 1.74                    | 0.01         | 1.13    | 0.02         | 0.6     | 0            | -0.05   | 0            |
| <b>Weight</b>                   | 0.75                    | 0.04         | 0.61    | 0.09         | 0.14    | 0            | 0.07    | 0.01         |
|                                 | 0.21                    | 0.03         | 0.18    | 0.09         | 0.03    | 0            | 0.04    | 0.06         |
| <b>Baseline SBP</b>             |                         |              | 0.39    | 0.51         | 0.61    | 0.71         | 0.02    | 0.02         |
| <b>Baseline DBP</b>             | 1.3                     | 0.51         |         |              | 0.3     | 0.05         | 0.06    | 0.05         |
| <b>Baseline MBP</b>             | 0.84                    | 0.29         | 0.42    | 0.24         | 0.42    | 0.12         | 0.03    | 0.02         |
| <b>Baseline PP</b>              | 1.18                    | 0.71         | 0.18    | 0.05         |         |              | 0       | 0            |
| <b>Baseline ASI</b>             | 0.83                    | 0.02         | 0.78    | 0.05         | 0.06    | 0            |         |              |
| <i>+ Age / Sex</i>              |                         |              |         |              |         |              |         |              |
| <b>SBP</b>                      |                         |              | 0.43    | 0.52         | 0.57    | 0.56         | 0       | 0            |
| <b>DBP</b>                      | 1.26                    | 0.47         |         |              | 0.26    | 0.04         | 0.04    | 0.02         |
| <b>MBP</b>                      | 0.76                    | 0.22         | 0.43    | 0.23         | 0.33    | 0.07         | 0.02    | 0.01         |
| <b>PP</b>                       | 1.18                    | 0.59         | 0.18    | 0.05         |         |              | -0.02   | 0.01         |
| <b>ASI</b>                      | 0.17                    | 0            | 0.64    | 0.03         | -0.46   | 0.01         |         |              |
| <i>+ CV RFs</i>                 |                         |              |         |              |         |              |         |              |
| <b>SBP</b>                      |                         |              | 0.41    | 0.46         | 0.59    | 0.54         | 0       | 0            |
| <b>DBP</b>                      | 1.22                    | 0.41         |         |              | 0.22    | 0.03         | 0.04    | 0.02         |
| <b>MBP</b>                      | 0.74                    | 0.19         | 0.42    | 0.20         | 0.31    | 0.06         | 0.02    | 0.01         |
| <b>PP</b>                       | 1.14                    | 0.55         | 0.14    | 0.06         |         |              | -0.02   | 0.01         |
| <b>ASI</b>                      | 0.08                    | 0.02         | 0.59    | 0.05         | -0.5    | 0.01         |         |              |

Dependent variables are shown in each column, with independent variables listed by row.

**Table S3. Effect of adjustment of baseline associations between blood pressure, arterial stiffness and demographic characteristics, adjusted for measurement variation between baseline and the second follow up visit.** Adjustment for measurement variation is derived from the internal variability estimated in patients with ASI measured at baseline and the second follow-up visit. The beta-coefficient for the general linear model is reported for univariate associations, adjusted non-parametrically (see methods) or parametrically by Cronbach's alpha. Differences in R<sup>2</sup> values are determined by dis-attenuation. Multivariate adjustment for measurement variation is performed by multi-variate regression calibration. SBP=systolic blood pressure; DBP = diastolic blood pressure; MBP = mean blood pressure; HTN = hypertension; PP = pulse pressure; BMI = body mass index; n=169,742

|                                     | SBP           |                  |              | DBP           |                  |              | PP            |                  |              | ASI           |                  |              |
|-------------------------------------|---------------|------------------|--------------|---------------|------------------|--------------|---------------|------------------|--------------|---------------|------------------|--------------|
|                                     | $\beta_{raw}$ | $\beta_{\alpha}$ | $\beta_{np}$ | $\beta_{raw}$ | $\beta_{\alpha}$ | $\beta_{np}$ | $\beta_{raw}$ | $\beta_{\alpha}$ | $\beta_{np}$ | $\beta_{raw}$ | $\beta_{\alpha}$ | $\beta_{np}$ |
| <i>Effect on <math>\beta</math></i> |               |                  |              |               |                  |              |               |                  |              |               |                  |              |
| Age                                 | 0.75          | 0.75             | 0.75         | 0.05          | 0.05             | 0.05         | 0.70          | 0.70             | 0.70         | 0.08          | 0.08             | 0.08         |
| Creatinine                          | 0.06          | 0.08             | 0.07         | 0.03          | 0.04             | 0.03         | 0.03          | 0.04             | 0.03         | 0.02          | 0.03             | 0.02         |
| Cholesterol                         | 1.72          | 2.19             | 2.29         | 1.16          | 1.48             | 1.54         | 0.55          | 0.70             | 0.73         |               |                  |              |
| BMI                                 | 0.73          | 0.82             | 0.76         | 0.59          | 0.66             | 0.62         | 0.14          | 0.16             | 0.15         | 0.07          | 0.08             | 0.07         |
| SBP                                 |               |                  |              | 0.38          | 0.53             | 0.48         | 0.62          | 0.87             | 0.79         | 0.03          | 0.04             | 0.04         |
| DBP                                 | 1.28          | 1.85             | 1.59         |               |                  |              | 0.28          | 0.40             | 0.35         | 0.06          | 0.09             | 0.07         |
| PP                                  | 1.16          | 1.67             | 1.74         | 0.16          | 0.23             | 0.24         |               |                  |              | 0.02          | 0.03             | 0.03         |
| ASI                                 | 0.94          | 3.09             | 2.92         | 0.6           | 1.97             | 1.86         | 0.34          | 1.12             | 1.06         |               |                  |              |
| <i>Effect on <math>r^2</math></i>   | $r^2$         | $r^2_{dis}$      |              | $r^2$         | $r^2_{dis}$      |              | $r^2$         | $r^2_{dis}$      |              | $r^2$         | $r^2_{dis}$      |              |
| Age                                 | 0.106         | 0.144            |              | 0.002         | 0.003            |              | 0.174         | 0.236            |              | 0.043         | 0.130            |              |
| Creatinine                          | 0.004         | 0.006            |              | 0.004         | 0.007            |              | 0.002         | 0.003            |              | 0.009         | 0.031            |              |
| Cholesterol                         | 0.011         | 0.019            |              | 0.017         | 0.030            |              | 0.002         | 0.003            |              | 0.000         | 0.000            |              |
| BMI                                 | 0.035         | 0.050            |              | 0.077         | 0.115            |              | 0.003         | 0.004            |              | 0.013         | 0.042            |              |
| SBP                                 |               |                  |              | 0.488         | 0.94             |              | 0.715         | 1.316            |              | 0.024         | 0.099            |              |
| DBP                                 | 0.488         | 0.94             |              |               |                  |              | 0.045         | 0.087            |              | 0.034         | 0.146            |              |
| PP                                  | 0.715         | 1.308            |              | 0.045         | 0.086            |              |               |                  |              | 0.006         | 0.024            |              |
| ASI                                 | 0.024         | 0.099            |              | 0.034         | 0.146            |              | 0.006         | 0.025            |              |               |                  |              |
| <i>+ Age / Sex</i>                  | $\beta$       | <i>p-val</i>     |              | $\beta$       | <i>p-val</i>     |              | $\beta$       | <i>p-val</i>     |              | $\beta$       | <i>p-val</i>     |              |
| SBP                                 |               |                  |              | 0.72          | <0.001           |              | 1.03          | <0.001           |              | 0.02          | <0.001           |              |
| DBP                                 | 2.42          | <0.001           |              |               |                  |              | 0.50          | <0.001           |              | 0.09          | <0.001           |              |
| PP                                  | 2.42          | <0.001           |              | 0.34          | <0.001           |              |               |                  |              | -0.01         | <0.001           |              |
| ASI                                 | 2.10          | <0.001           |              | 2.67          | <0.001           |              | -0.57         | <0.001           |              |               |                  |              |
| <i>+ CV RFs</i>                     |               |                  |              |               |                  |              |               |                  |              |               |                  |              |
| SBP                                 |               |                  |              | 0.72          | <0.001           |              | 1.05          | <0.001           |              | 0.02          | <0.001           |              |
| DBP                                 | 2.51          | <0.001           |              |               |                  |              | 0.50          | <0.001           |              | 0.09          | <0.001           |              |
| PP                                  | 2.42          | <0.001           |              | 0.34          | <0.001           |              |               |                  |              | -0.01         | <0.001           |              |
| ASI                                 | 2.15          | <0.001           |              | 2.75          | <0.001           |              | -0.60         | <0.001           |              |               |                  |              |

Dependent variables are shown in each column, with independent variables listed by row. Results are reported as  $\beta$  coefficients and  $r^2$  for univariate models, and adjusted for age and sex or age, sex and CV risk factors (diabetes, current smoking and cholesterol)

**Table S4. Associations between measures of blood pressure and arterial stiffness at baseline, with percentage change in these indices per annum at follow-up, adjusted for baseline measures, standardised by centre and including only patients with notched ASI recordings at baseline and follow-up.** Beta-coefficients and  $r^2$  are shown for univariate general linear models. In models adjusted for age / sex or for age / sex / cardiovascular risk factors (CV RFs = diabetes, current smoking and cholesterol) the beta-coefficient for each key index (row) with the dependent variable (by column) is given, with  $R^2$  squared change compared to the models including only age and sex; or age, sex and CV RFs. Associations are reported for those with arterial stiffness index (ASI) was recorded at baseline. SBP=systolic blood pressure; DBP = diastolic blood pressure; MBP = mean blood pressure; HTN = hypertension; PP = pulse pressure; BMI = body mass index; n=13761

| Baseline Indices   | Percentage Change in Indices per annum at either follow-up |              |         |              |         |              |         |              |
|--------------------|------------------------------------------------------------|--------------|---------|--------------|---------|--------------|---------|--------------|
|                    | SBP                                                        |              | DBP     |              | PP      |              | ASI     |              |
|                    | $\beta$                                                    | $\Delta R^2$ | $\beta$ | $\Delta R^2$ | $\beta$ | $\Delta R^2$ | $\beta$ | $\Delta R^2$ |
| <i>Univariate</i>  |                                                            |              |         |              |         |              |         |              |
| Age                | 0.02                                                       | 0.011        | -0.02   | 0.01         | 0.10    | 0.044        | 0.03    | 0.001        |
| Female             | 0.2                                                        | 0.007        | 0.15    | 0.004        | 0.27    | 0.003        | 1.19    | 0.015        |
| Diabetes           | -0.2                                                       | 0*           | -0.15   | 0*           | -0.64   | 0.001*       | 1.08    | 0*           |
| HTN                | 0.3                                                        | 0.004        | 0.12    | 0*           | 0.59    | 0.004        | 0.53    | 0.001        |
| Smoking Base       | 0.07                                                       | 0*           | 0.17    | 0*           | -0.03   | 0*           | 0.16    | 0*           |
| Ever Smoked        | 0.11                                                       | 0.001        | -0.01   | 0*           | 0.3     | 0.002        | 0.3     | 0*           |
| Creatinine         | 0.01                                                       | 0.004        | 0.01    | 0.001        | 0.01    | 0.004        | 0.03    | 0.003        |
| Cholesterol        | -0.02                                                      | 0*           | -0.04   | -0.001*      | 0.01    | 0.002*       | 0.03    | -0.002*      |
| BMI                | 0.03                                                       | 0.006        | 0.02    | 0.002        | 0.06    | 0.006        | 0.04    | 0.001        |
| Weight             | 0.01                                                       | 0.007        | 0.01    | 0.004        | 0.02    | 0.006        | 0.03    | 0.006        |
| SBP                | -0.04                                                      | 0            | -0.01   | 0.005        | 0.01    | 0.002        | 0.03    | 0.006        |
| DBP                | 0                                                          | 0*           | -0.07   | 0            | 0.01    | 0.002        | 0.07    | 0.01         |
| MBP                | 0.01                                                       | 0.004        | -0.03   | 0.005        | -0.05   | 0            | 0.06    | 0.009        |
| PP                 | 0                                                          | 0*           | -0.01   | 0.005        | -0.11   | 0            | 0.02    | 0.001        |
| ASI                | 0.04                                                       | 0.004        | 0.01    | 0*           | 0.1     | 0.007        | -1.42   | 0            |
| <i>+ Age / Sex</i> |                                                            |              |         |              |         |              |         |              |
| SBP                | -0.04                                                      | 0            | -0.01   | 0.002        | 0.01    | 0.001        | 0.02    | 0.002        |
| DBP                | 0.01                                                       | 0*           | -0.07   | 0            | 0.01    | 0.001        | 0.06    | 0.006        |
| MBP                | 0.01                                                       | 0*           | -0.02   | 0.002        | -0.06   | 0            | 0.05    | 0.006        |
| PP                 | -0.01                                                      | 0*           | -0.01   | 0.002        | -0.13   | 0            | 0       | 0*           |
| ASI                | 0.02                                                       | 0.001        | 0.01    | 0*           | 0.03    | 0*           | -1.53   | 0            |
| <i>+ CV RFs</i>    |                                                            |              |         |              |         |              |         |              |
| SBP                | -0.05                                                      | -0.001       | -0.01   | 0            | 0.01    | 0.002*       | 0.02    | -0.001       |
| DBP                | 0.01                                                       | -0.001*      | -0.07   | -0.002       | 0.01    | 0.002*       | 0.06    | 0.003        |
| MBP                | 0.01                                                       | 0.001        | -0.02   | 0.001        | -0.058  | 0.001        | 0.05    | 0.005        |
| PP                 | -0.01                                                      | -0.001*      | -0.01   | 0            | -0.13   | 0.002        | 0       | -0.002*      |
| ASI                | 0.01                                                       | -0.001*      | 0.01    | -0.002*      | 0.02    | 0.002*       | -1.54   | -0.002       |
| <i>+ SBP + DBP</i> |                                                            |              |         |              |         |              |         |              |
| PP                 | 0                                                          | -0.001*      | -0.01   | -0.002       | -0.14   | 0.001        | -0.07   | -0.003       |
| ASI                | 0.01                                                       | -0.001*      | 0       | -0.003*      | 0.02    | 0.001*       | -1.57   | -0.003       |

Dependent variables are shown in each column, with independent variables listed by row.

**Table S5. Associations between measures of blood pressure and arterial stiffness at baseline, with percentage change in these indices at follow-up, adjusted for baseline measures, standardised by centre and by age at baseline less than or greater than 60 years.** Beta-coefficients and  $r^2$  are shown for univariate general linear models. In models adjusted for age / sex or for age / sex / cardiovascular risk factors (diabetes, current smoking and cholesterol) the beta-coefficient for each key index (row) with the dependent variable (by column) is given, with the  $R^2$  squared change compared to the models including only age and sex; or age, sex and cardiovascular risk factors. Associations are reported for the population in whom arterial stiffness index (ASI) was recorded at baseline. SBP=systolic blood pressure; DBP = diastolic blood pressure; MBP = mean blood pressure; PP = pulse pressure; ASI = arterial stiffness index; All associations were significant except where indicated: \* =  $p>0.05$

| Baseline Indices  | Percentage change in indices per annum at either follow-up |              |         |              |         |              |         |              |
|-------------------|------------------------------------------------------------|--------------|---------|--------------|---------|--------------|---------|--------------|
|                   | SBP                                                        |              | DBP     |              | PP      |              | ASI     |              |
|                   | $\beta$                                                    | $\Delta R^2$ | $\beta$ | $\Delta R^2$ | $\beta$ | $\Delta R^2$ | $\beta$ | $\Delta R^2$ |
| <b>Age &lt;60</b> |                                                            |              |         |              |         |              |         |              |
| <i>Univariate</i> |                                                            |              |         |              |         |              |         |              |
| Age               | 0.03                                                       | 0.01         | -0.02   | 0.003        | 0.05    | 0.01         | 0.08    | 0.003        |
| Female            | 0.16                                                       | 0.005        | 0.19    | 0.008        | 0.06    | 0            | 0.63    | 0.003        |
| SBP               | -0.03                                                      | 0            | -0.004  | 0.001        | -0.17   | 0.13         | 0.04    | 0.007        |
| DBP               | 0.007                                                      | 0.001        | -0.07   | 0            | 0.34    | 0.13         | 0.07    | 0.009        |
| MBP               | 0.01                                                       | 0.001        | -0.013  | 0.001        | -0.04   | 0            | 0.06    | 0.009        |
| ASI               | 0.05                                                       | 0.009        | 0.018   | -0.017       | 0.12    | 0.02         | -1.43   | 0            |
| <i>Adjusted</i>   |                                                            |              |         |              |         |              |         |              |
| SBP               | -0.04                                                      | 0.002        | -0.005  | 0.003        | -0.19   | 0.15         | 0.03    | 0.001        |
| DBP               | 0.008                                                      | 0.003        | -0.07   | 0.002        | 0.37    | 0.15         | 0.07    | 0.004        |
| MBP               | 0.01                                                       | 0.003        | -0.014  | 0.003        | -0.05   | 0            | 0.05    | 0.003        |
| ASI               | 0.03                                                       | 0.001        | 0.01*   | -0.017       | 0.10    | 0.007        | -1.50   | -0.002       |
| <b>Age &gt;60</b> |                                                            |              |         |              |         |              |         |              |
| <i>Univariate</i> |                                                            |              |         |              |         |              |         |              |
| Age               | 0.01                                                       | 0.0003       | -0.02   | 0.001        | -0.02   | 0            | 0.17    | 0.003        |
| Female Sex        | 0.07                                                       | 0.001        | 0.07    | 0.001        | 0.19    | 0.002        | 0.93    | 0.007        |
| SBP               | -0.04                                                      | 0            | -0.01   | 0.005        | -0.13   | 0.12         | 0.03    | 0.005        |
| DBP               | -0.013                                                     | 0.003        | -0.07   | 0            | 0.27    | 0.11         | 0.04    | 0.002        |
| MBP               | -0.019                                                     | 0.002        | -0.03   | 0.004        | -0.07   | 0            | 0.05    | 0.004        |
| ASI               | 0.01*                                                      | 0.002        | -0.008  | -0.001       | 0.08    | 0            | -1.14   | 0            |
| <i>Adjusted</i>   |                                                            |              |         |              |         |              |         |              |
| SBP               | -0.05                                                      | 0.005        | -0.01   | 0.009        | -0.14   | 0.11         | 0.03    | 0.007        |
| DBP               | -0.015                                                     | 0.008        | -0.08   | 0.004        | 0.27    | 0.11         | 0.04    | 0.005        |
| MBP               | -0.022                                                     | 0.007        | -0.03   | 0.008        | -0.08   | 0.003        | 0.04    | 0.007        |
| ASI               | 0.004*                                                     | 0.01         | -0.01*  | 0.006        | 0.07    | 0.004        | -1.46   | 0.004        |

Dependent variables are shown in each column, with independent variables listed by row.

**Table S6. Risk of progression to hypertension or increased arterial stiffness index (ASI) at either follow-up.** Results are presented for progression from normotension (norm) to any hypertension (HTN), mixed hypertension (SDH) to isolated systolic hypertension (ISH) or from low ASI (<10m/s) to high ASI (>10m/s). Values are odds ratios (OR) for logistic regression and 95% confidence intervals (CI), unadjusted and adjusted for variability, by non-parametric (NP) or parametric (Para) methods. . SBP=systolic blood pressure; DBP = diastolic blood pressure; BMI = body mass index

|                          | Norm → HTN |      |      | SDH → ISH |      |      | Norm → ISH |      |      | ASI Transition |      |      |
|--------------------------|------------|------|------|-----------|------|------|------------|------|------|----------------|------|------|
|                          | Unadj      | Para | NP   | Unadj     | Para | NP   | Unadj      | Para | NP   | Unadj          | Para | NP   |
| <b><i>Unadjusted</i></b> |            |      |      |           |      |      |            |      |      |                |      |      |
| ASI                      | 1.36       | 2.60 | 2.53 | 0.98      | 0.94 | 0.95 | 1.30       | 2.29 | 2.23 | 1.22           | 2.78 | 1.84 |
| SBP                      | 2.59       | 4.80 | 3.35 | 1.40      | 2.32 | 1.53 | 2.58       | 4.77 | 3.33 | 1.25           | 1.35 | 1.32 |
| DBP                      | 1.81       | 2.49 | 2.09 | 0.74      | 0.33 | 0.69 | 1.39       | 1.67 | 1.51 | 1.21           | 1.3  | 1.26 |
| Cholesterol              | 1.12       | 1.14 | 1.15 | 0.98      | 0.97 | 0.97 | 1.16       | 1.20 | 1.21 | 1.04           | 1.04 | 1.05 |
| Creatinine               | 1.18       | 1.23 | 1.21 | 1.00      | 1.00 | 1.00 | 1.07       | 1.09 | 1.08 | 1.09           | 1.11 | 1.1  |
| BMI                      | 1.38       | 1.43 | 1.40 | 0.94      | 0.93 | 0.93 | 1.18       | 1.20 | 1.19 | 1.05           | 1.05 | 1.05 |
| Weight                   | 1.35       | 1.37 | 1.36 | 0.94      | 0.93 | 0.94 | 1.13       | 1.14 | 1.13 | 1.11           | 1.12 | 1.11 |

**Figure S1. Flow chart of participants at each stage of the study.** The key analyses (in yellow) are performed for cross-sectional analyses at baseline in individuals in whom ASI was measured, and for rate of progression of indices by pooling individuals from both follow-ups, including participants with arterial stiffness index (ASI) measured at baseline and at a minimum of one follow-up. Most participants had blood pressure measured at baseline, but only a proportion had ASI measured (at specific centres). Different participants were followed up at each follow-up visit, with only a limited number who had ASI measured at baseline followed up at any follow-up, and a very limited number followed up at both follow-ups. The numbers progressing directly from one group to another are shown adjacent to arrows, whilst the number in each group are shown within each box.

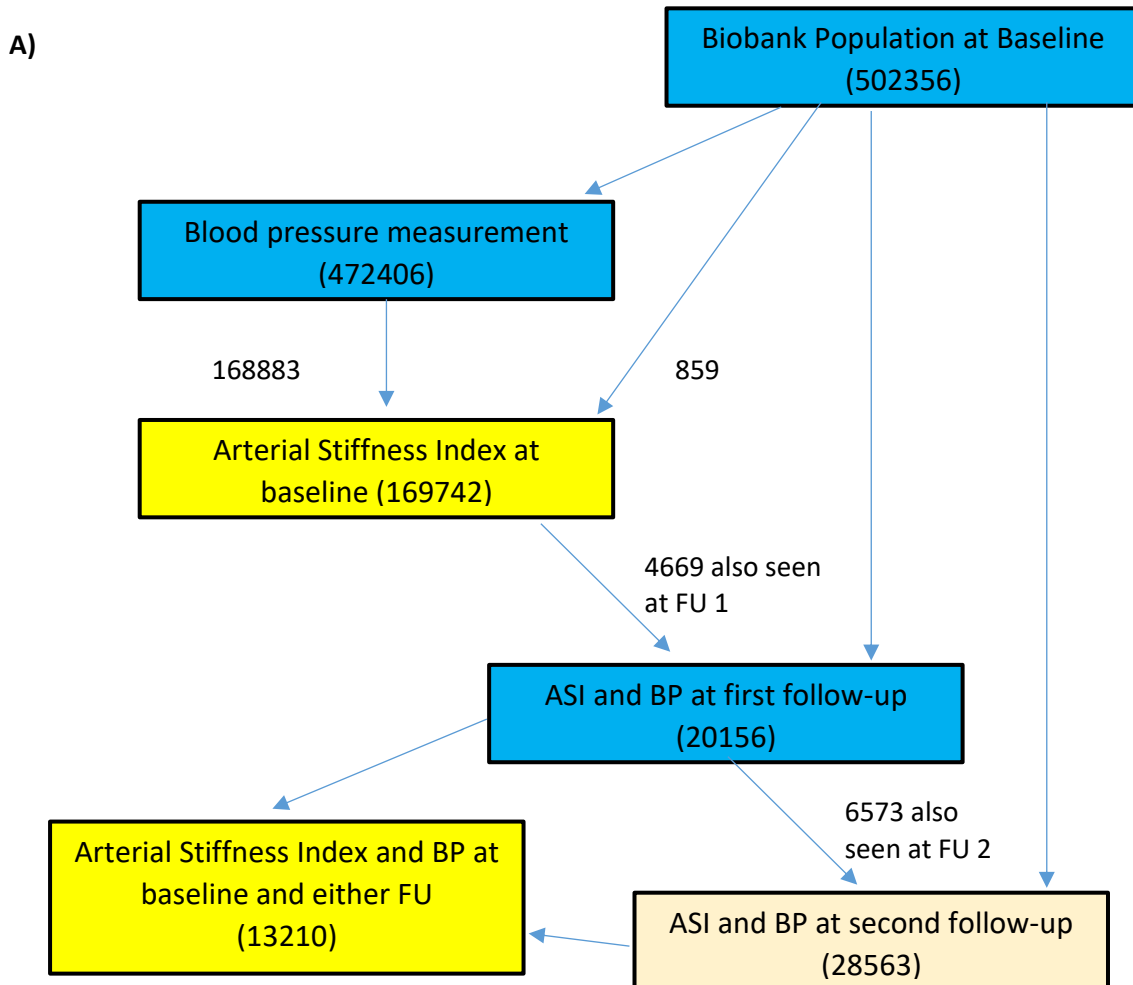

## B) Statistical Analyses

### Cross-sectional Relationships

- Performed at baseline and follow-up 2
- Associations between SBP, DBP, PP and ASI, univariate and adjusted for confounders (general linear models)
- Adjusted for visit-to-visit variability in predictors by regression calibration and regression dilution ratio
- Evolution of relationships between ASI, SBP and DBP with age determined by stratification into deciles of age, and quartiles of BP indices

### Longitudinal Relationships

- In population with ASI and BP at baseline and either follow up
- Indices standardised by % change per annum
- Associations between baseline SBP, DBP, PP and ASI and progression of these indices determined for univariate associations and adjusted for confounders (general linear models)
- Risk of transition to hypertensive phenotypes (mixed hypertension, isolated systolic hypertension, diastolic hypertension) or excess ASI determined by logistic regression



**Figure S2. Recorded BP and arterial stiffness measures at baseline and follow up, stratified by baseline Biobank assessment centre.** Variation in mean indices at each centre is shown for mean ASI (A+B), DBP (C), SBP (D) and pulse pressure (E) at baseline, first follow-up and second follow-up, stratified by the baseline centre attended. Significant variation between centres is seen for ASI and SBP, with greater between-centre variation for measures taken at baseline than measures taken at follow-up for both SBP and ASI. Differences between visits and across follow-ups were more consistent for DBP and PP. SBP=systolic blood pressure; DBP = diastolic blood pressure; MBP = mean blood pressure; PP = pulse pressure; ASI = arterial stiffness index; FU = follow-up.

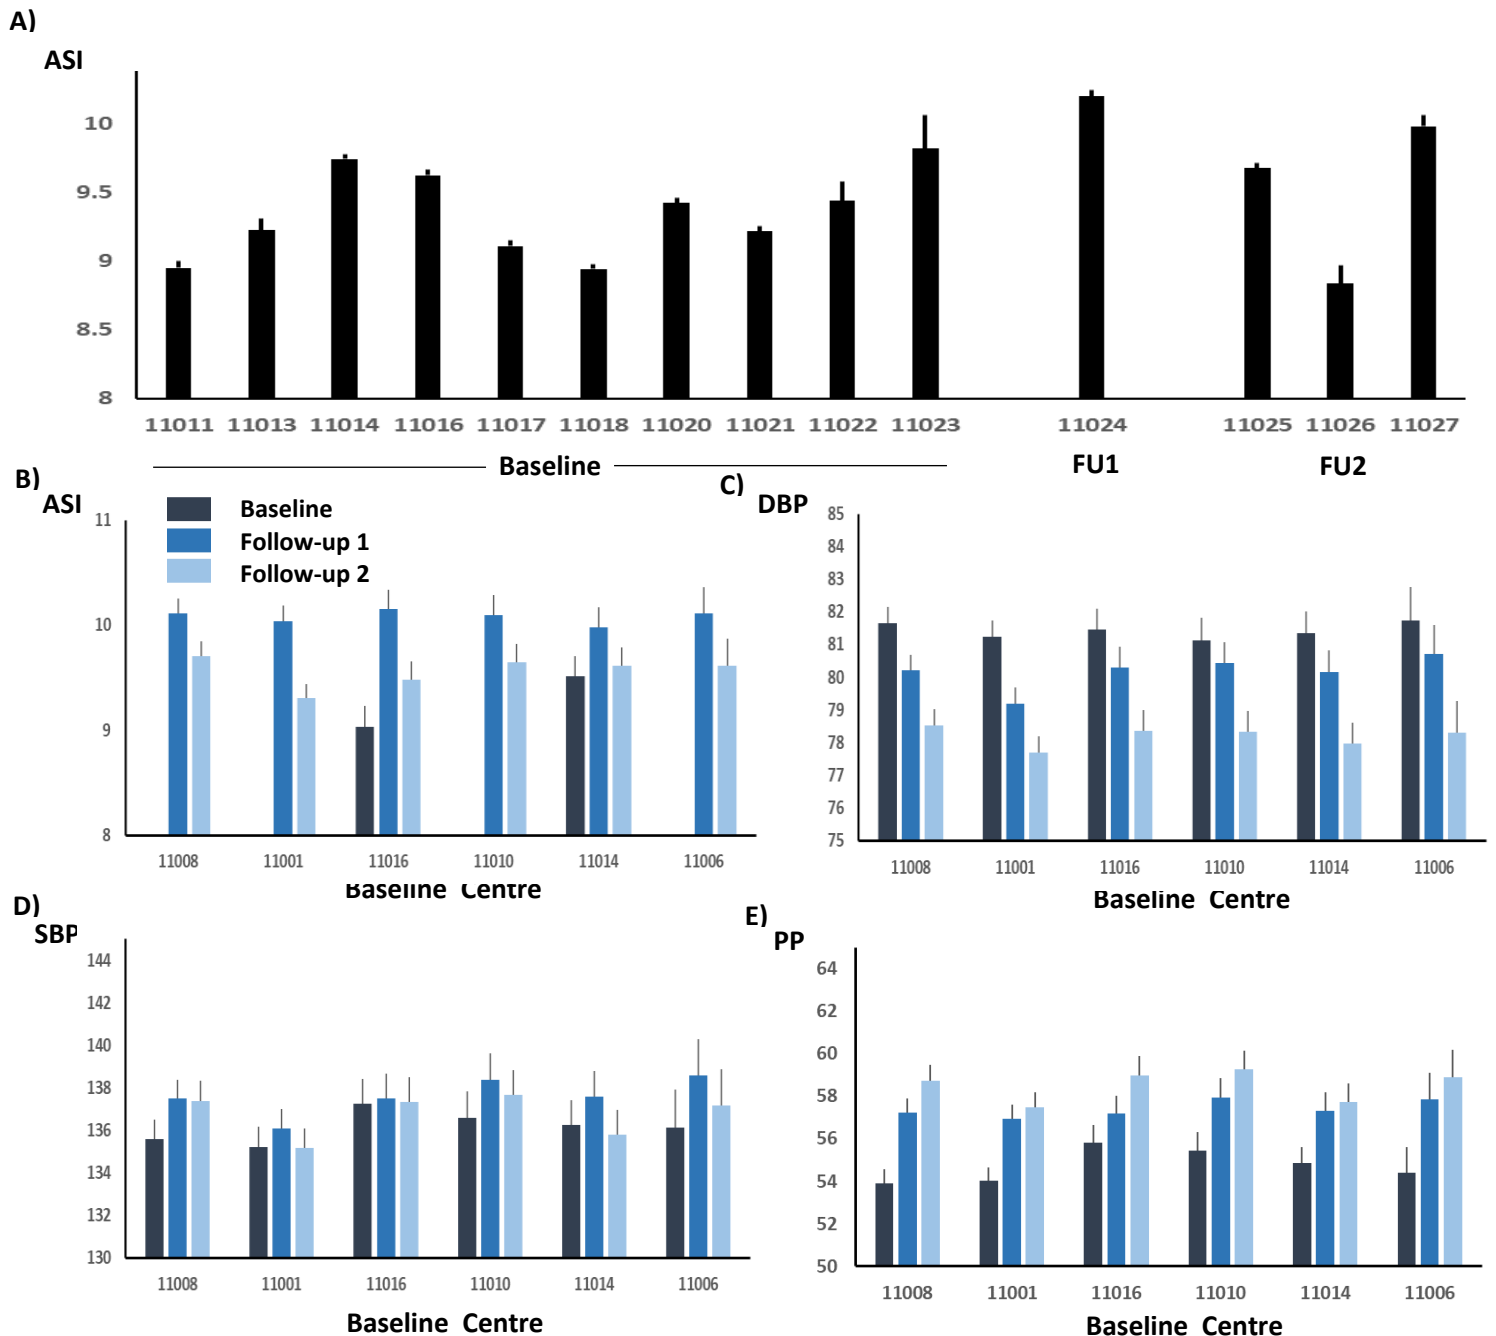

**Figure S3. Average pulse waveforms by tertile of Arterial stiffness index (ASI) at baseline across the whole population, stratified by quartile of age.**

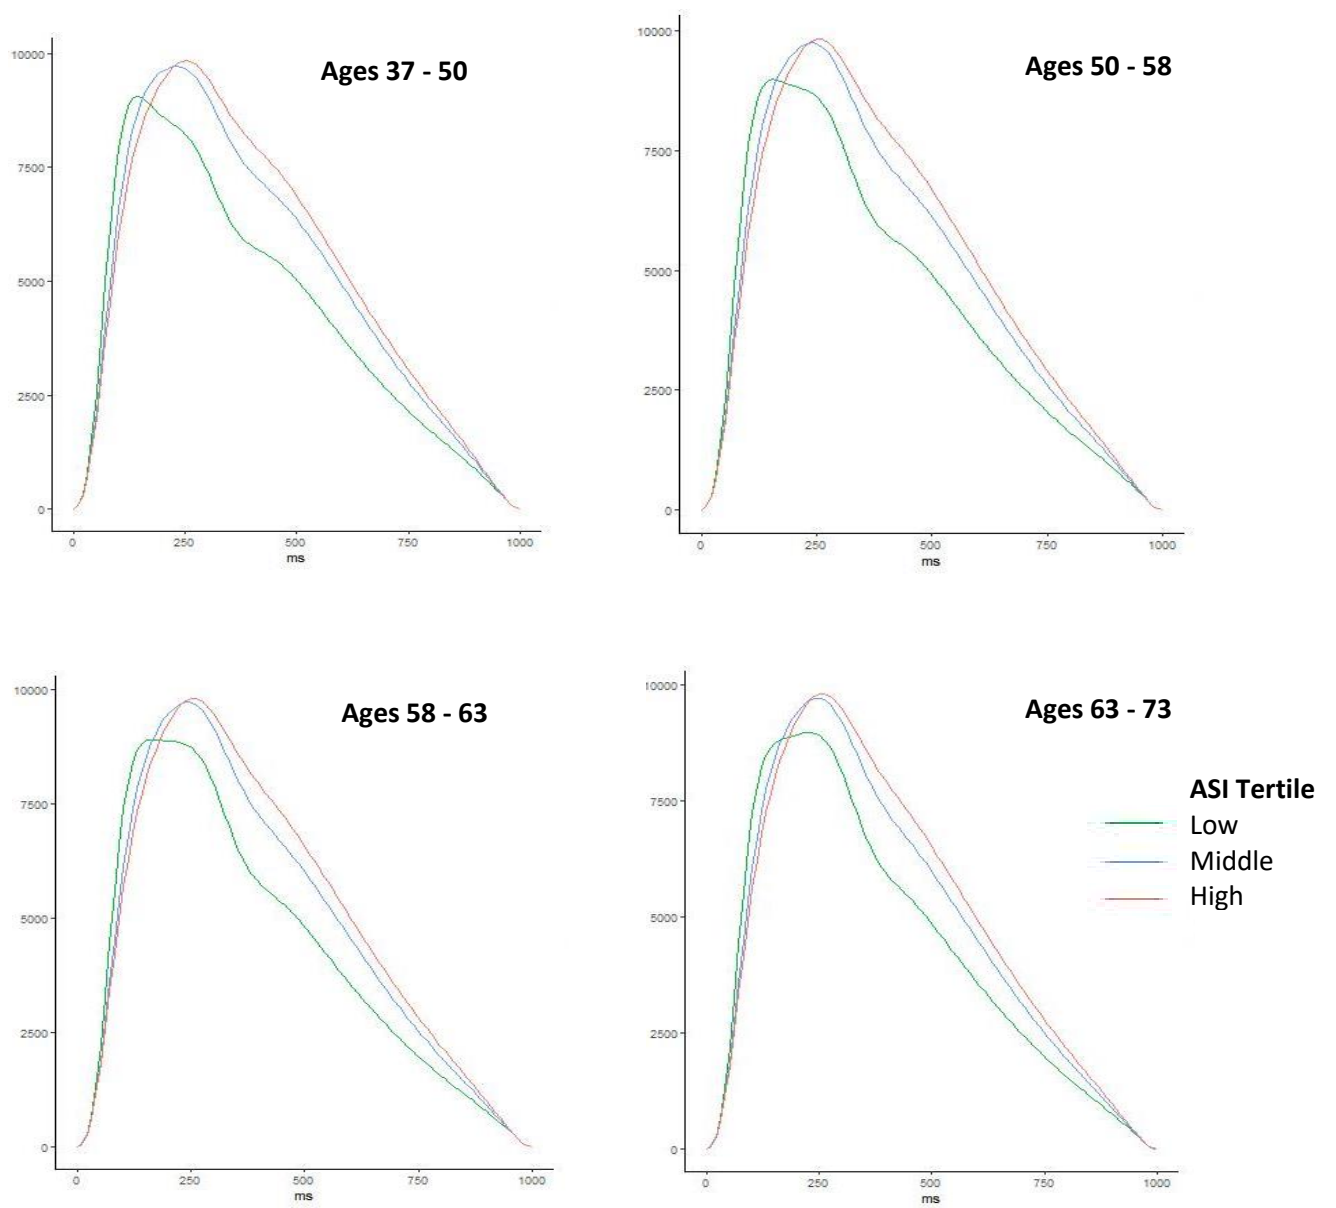

**Figure S4. Relationship between baseline arterial stiffness index (ASI), age and blood pressure variability at baseline.** ASI is divided into deciles, and stratified by quartiles of age, plotted against standard deviation of systolic BP (SBP-SD) or diastolic BP (DBP-SD) or their coefficients of variation (CV)

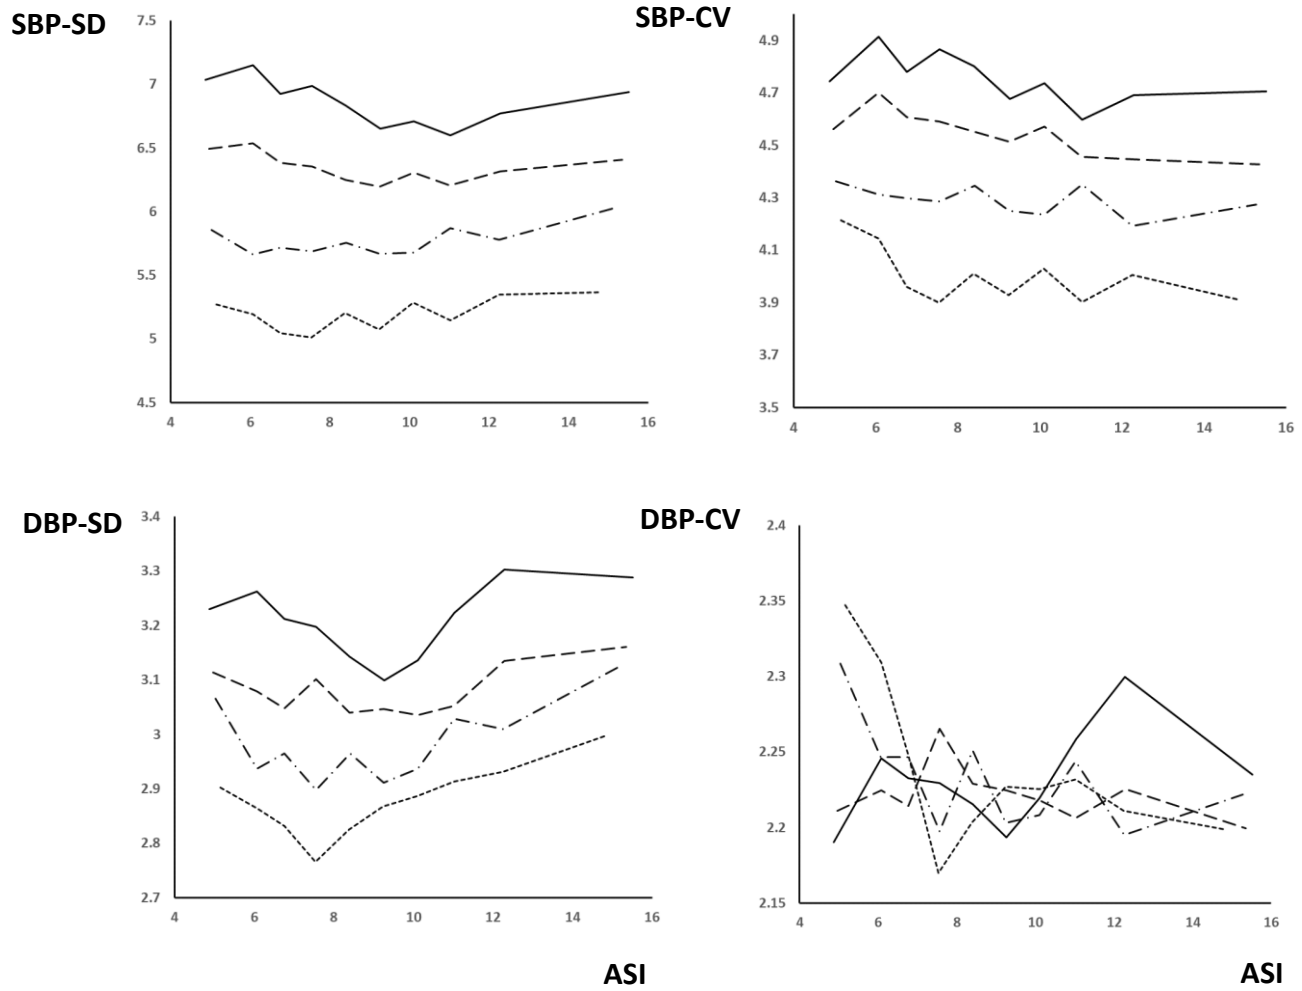

Supplement: JAH3-9-e014547-s001.pdf [file JAH3-9-e014547-s001.pdf]
